# Supplementary material for: Molecular docking analysis and evaluation of the antimicrobial properties of the constituents of Geranium wallichianum D. Don ex Sweet from Kashmir Himalaya
Source: PubMed Central journal article supplement (PMC9307801; doi:10.1038/s41598-022-16102-9), 2022-07-22
Supplement: 41598_2022_16102_MOESM1_ESM.pdf [file 41598_2022_16102_MOESM1_ESM.pdf]

### MS Spectrum

BG Mode:Averaged 0.314-0.694(199-439)\$EndIf\$ Segment 1 - Event 1

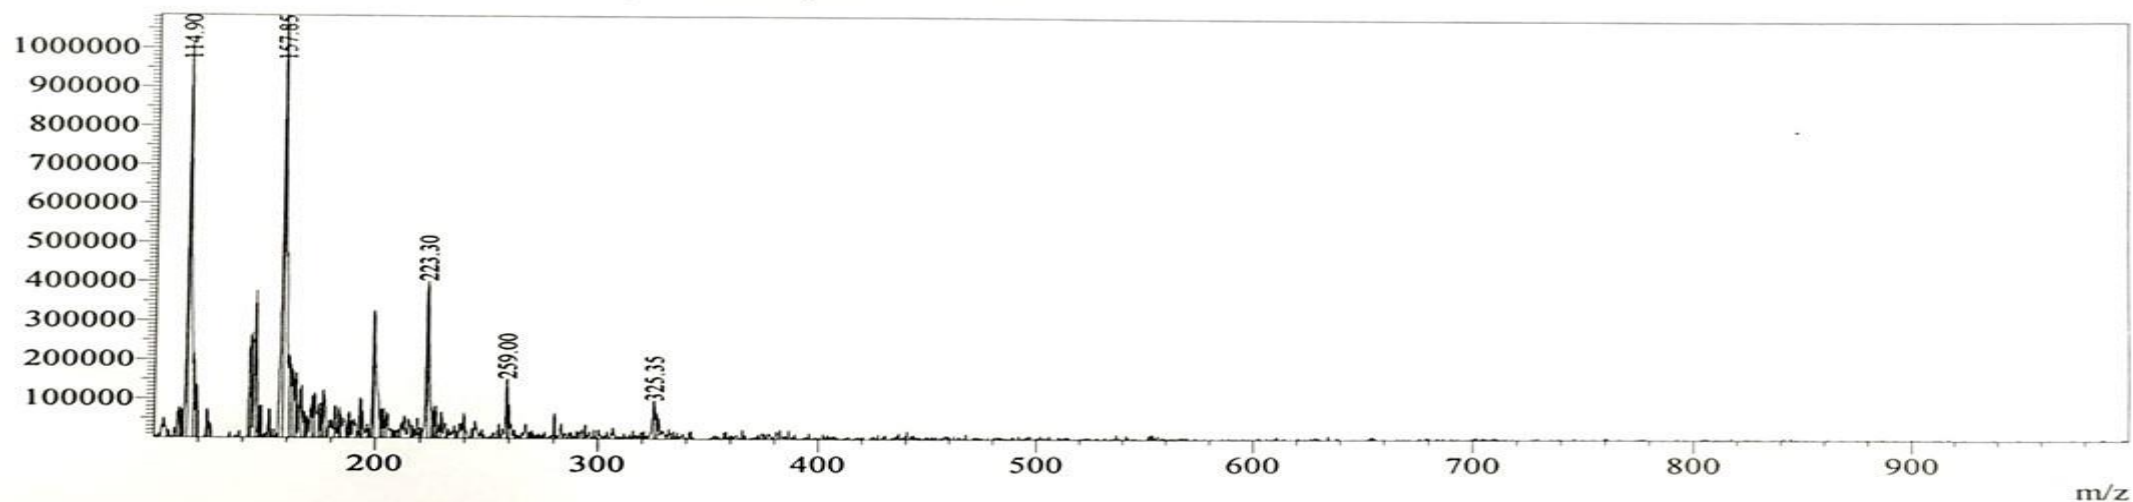

BG Mode:Averaged 0.315-0.695(200-440)\$EndIf\$ Segment 1 - Event 2

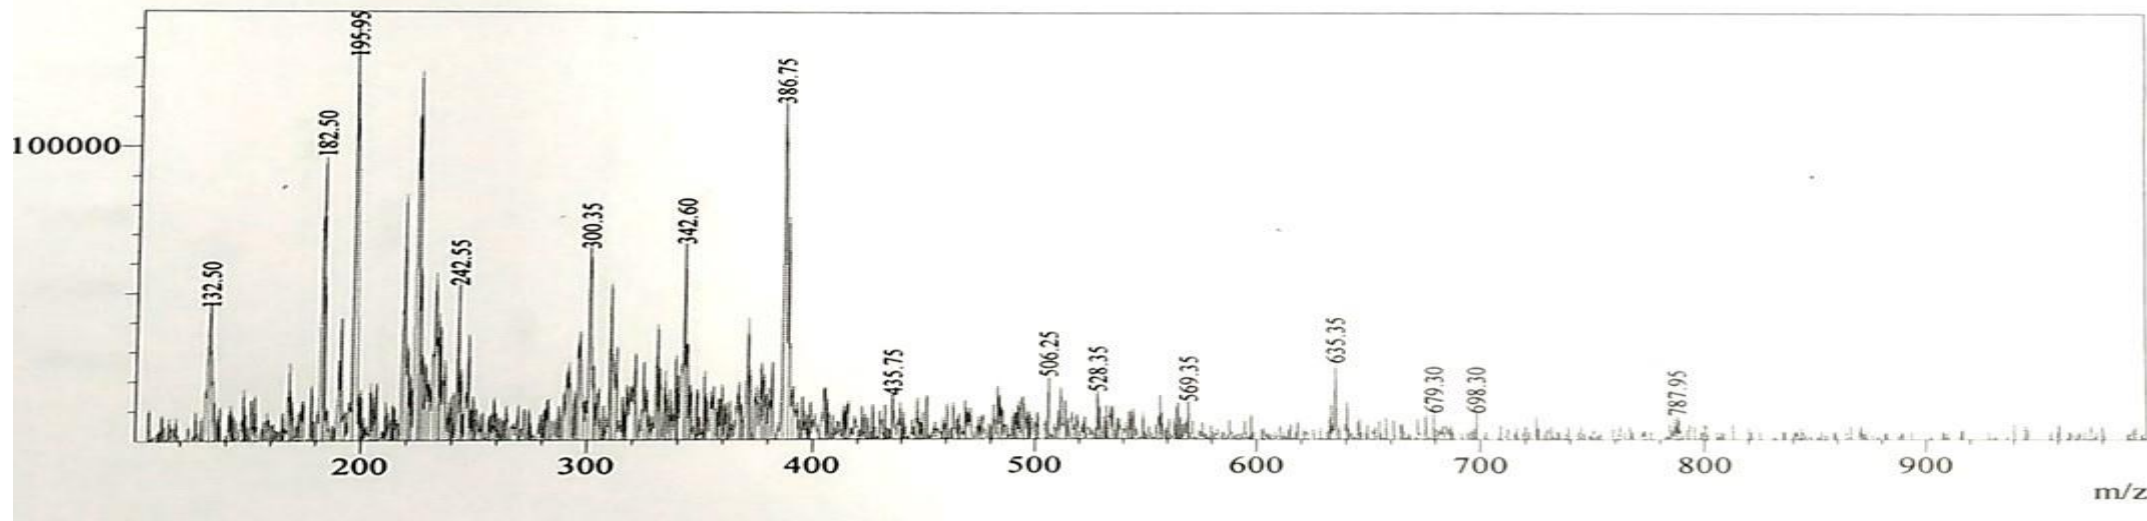

**Fig. S1. LC-MS-ESI-MS chromatograms of reference compounds using Nexera in Ethanolic extract**

MS Spectrum

BG Mode: Averaged 0.314-0.624(199-395) Segment 1 - Event 1

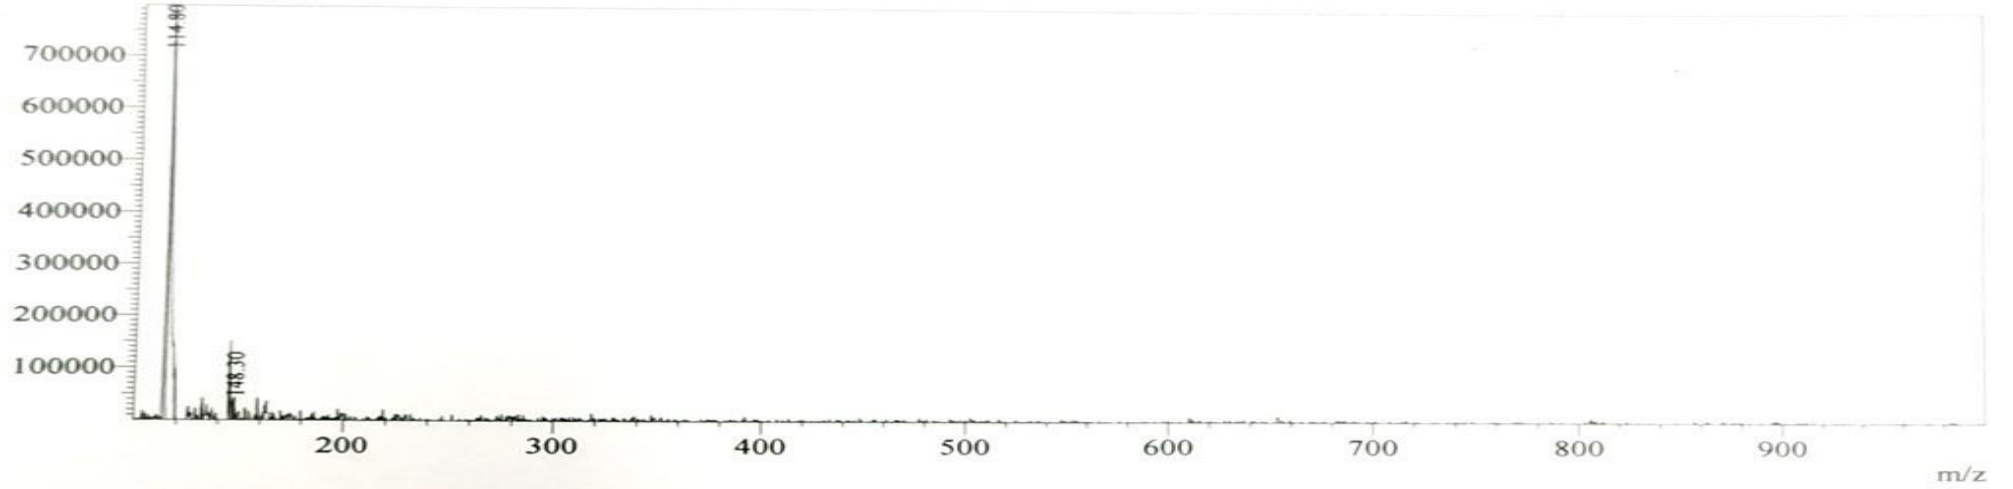

BG Mode: Averaged 0.315-0.625(200-396) Segment 1 - Event 2

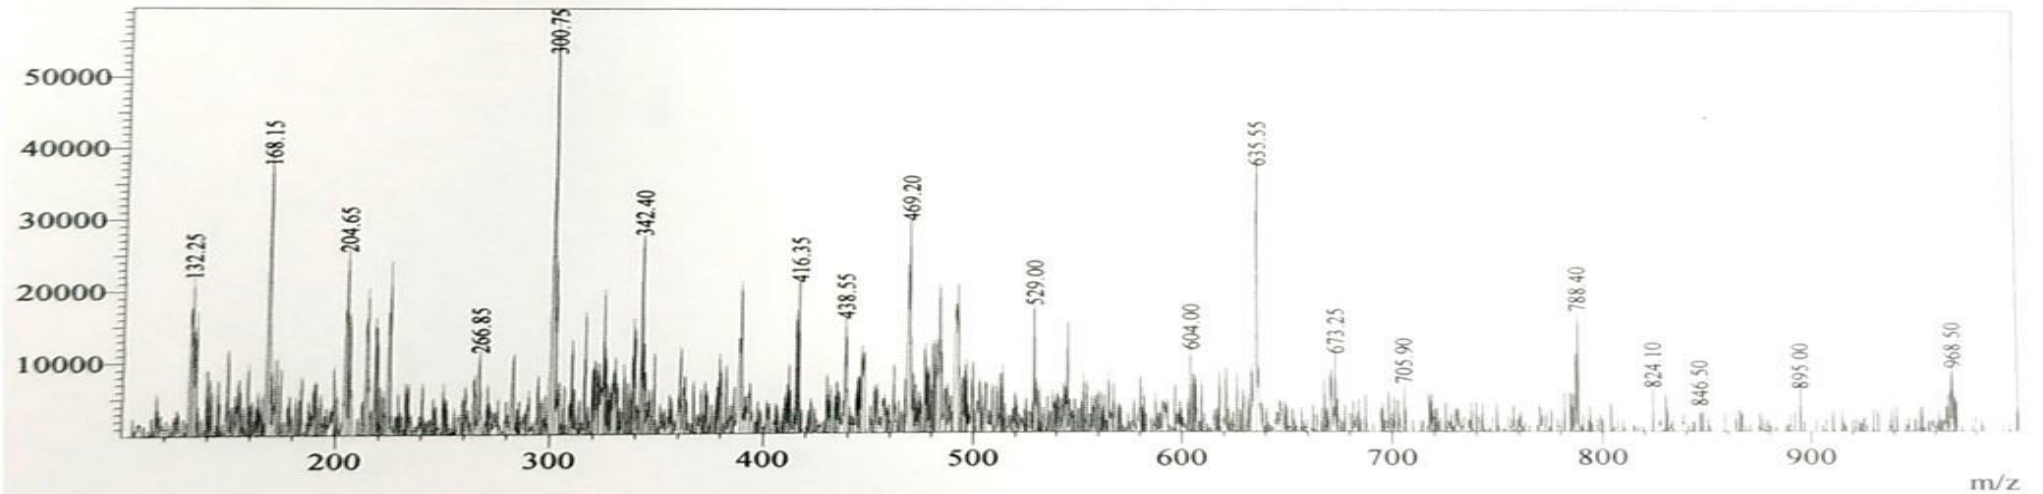

**Fig. S2. LC-MS-ESI-MS chromatograms of reference compounds using Nexera in Ethyl acetate extract**

MS Spectrum

BG Mode: Averaged 0.405-0.994(257-629)\$EndIf\$ Segment 1 - Event 1

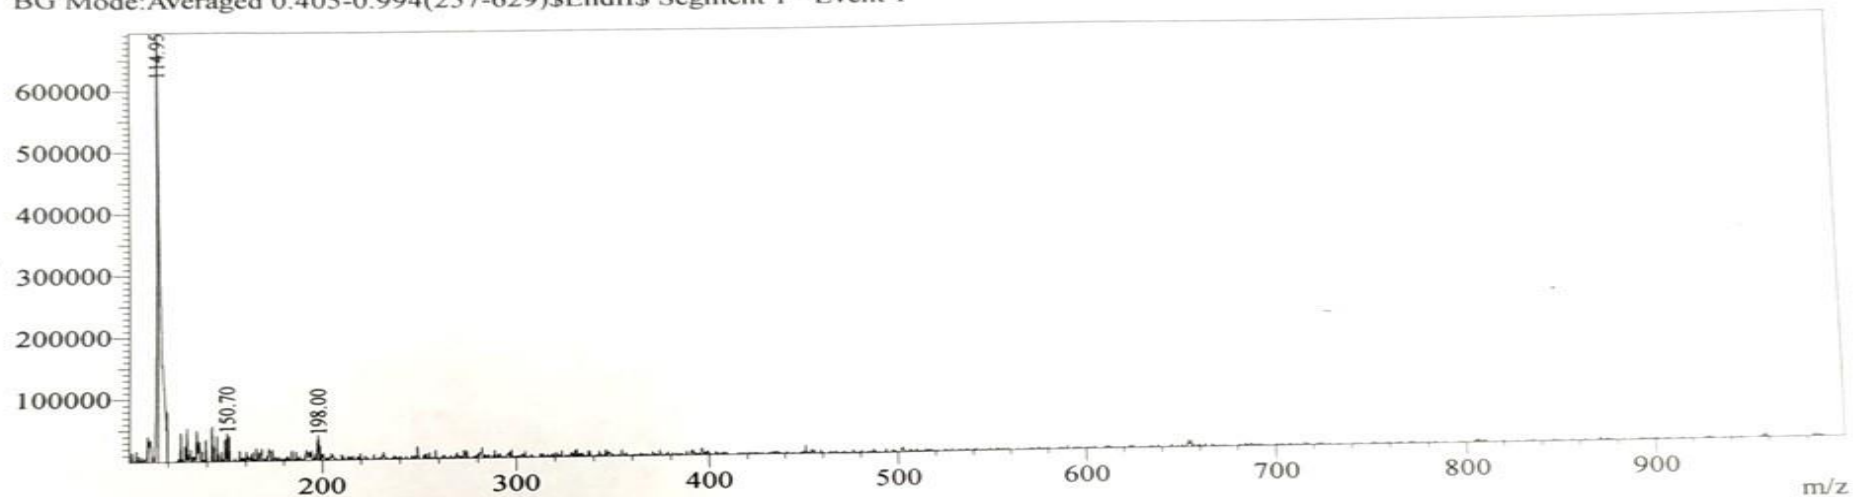

BG Mode: Averaged 0.407-0.996(258-630)\$EndIf\$ Segment 1 - Event 2

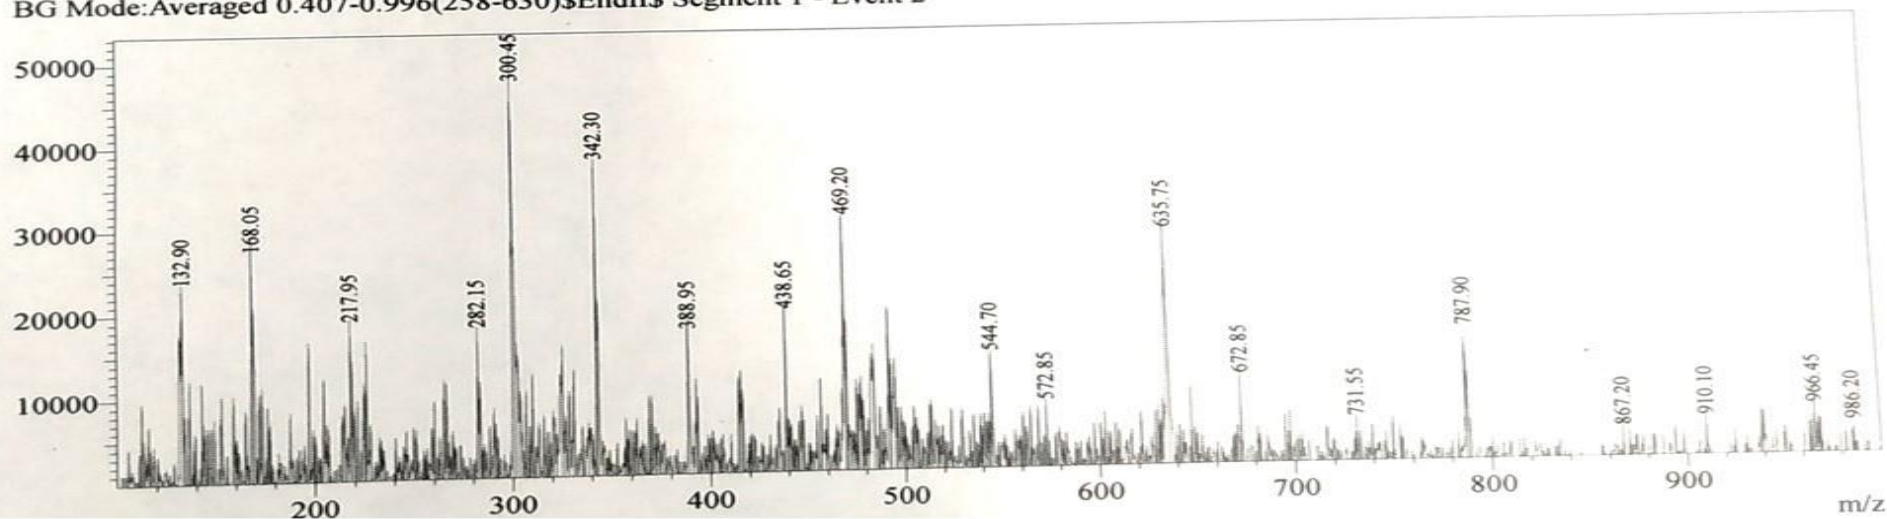

**Fig. S3. LC-MS-ESI-MS chromatograms of reference compounds using Nexera in Petroleum ether extract**

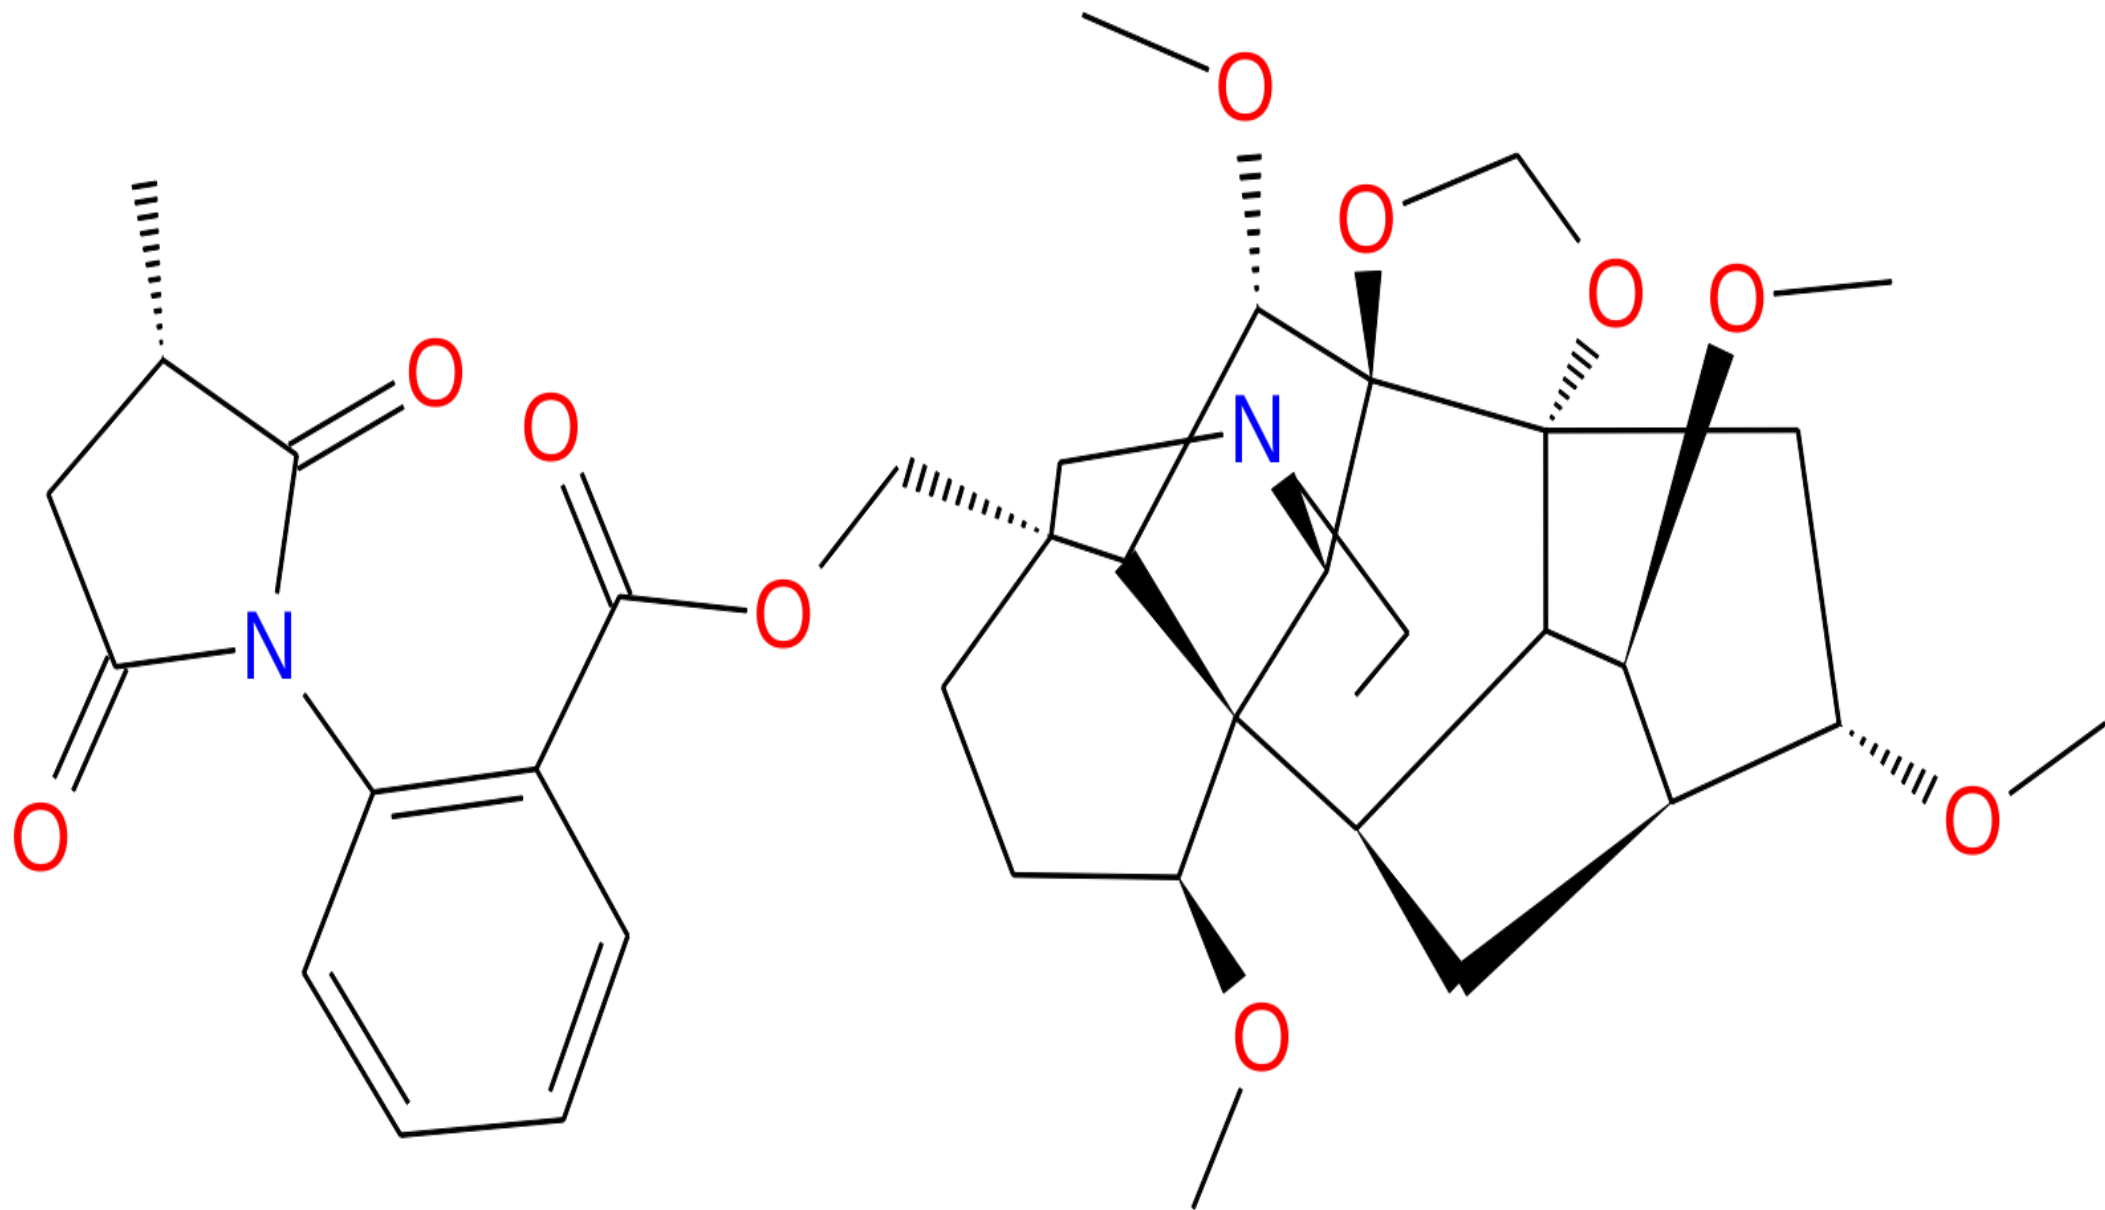

**Fig. S4. 2d structure of Ligand (Elatine)**

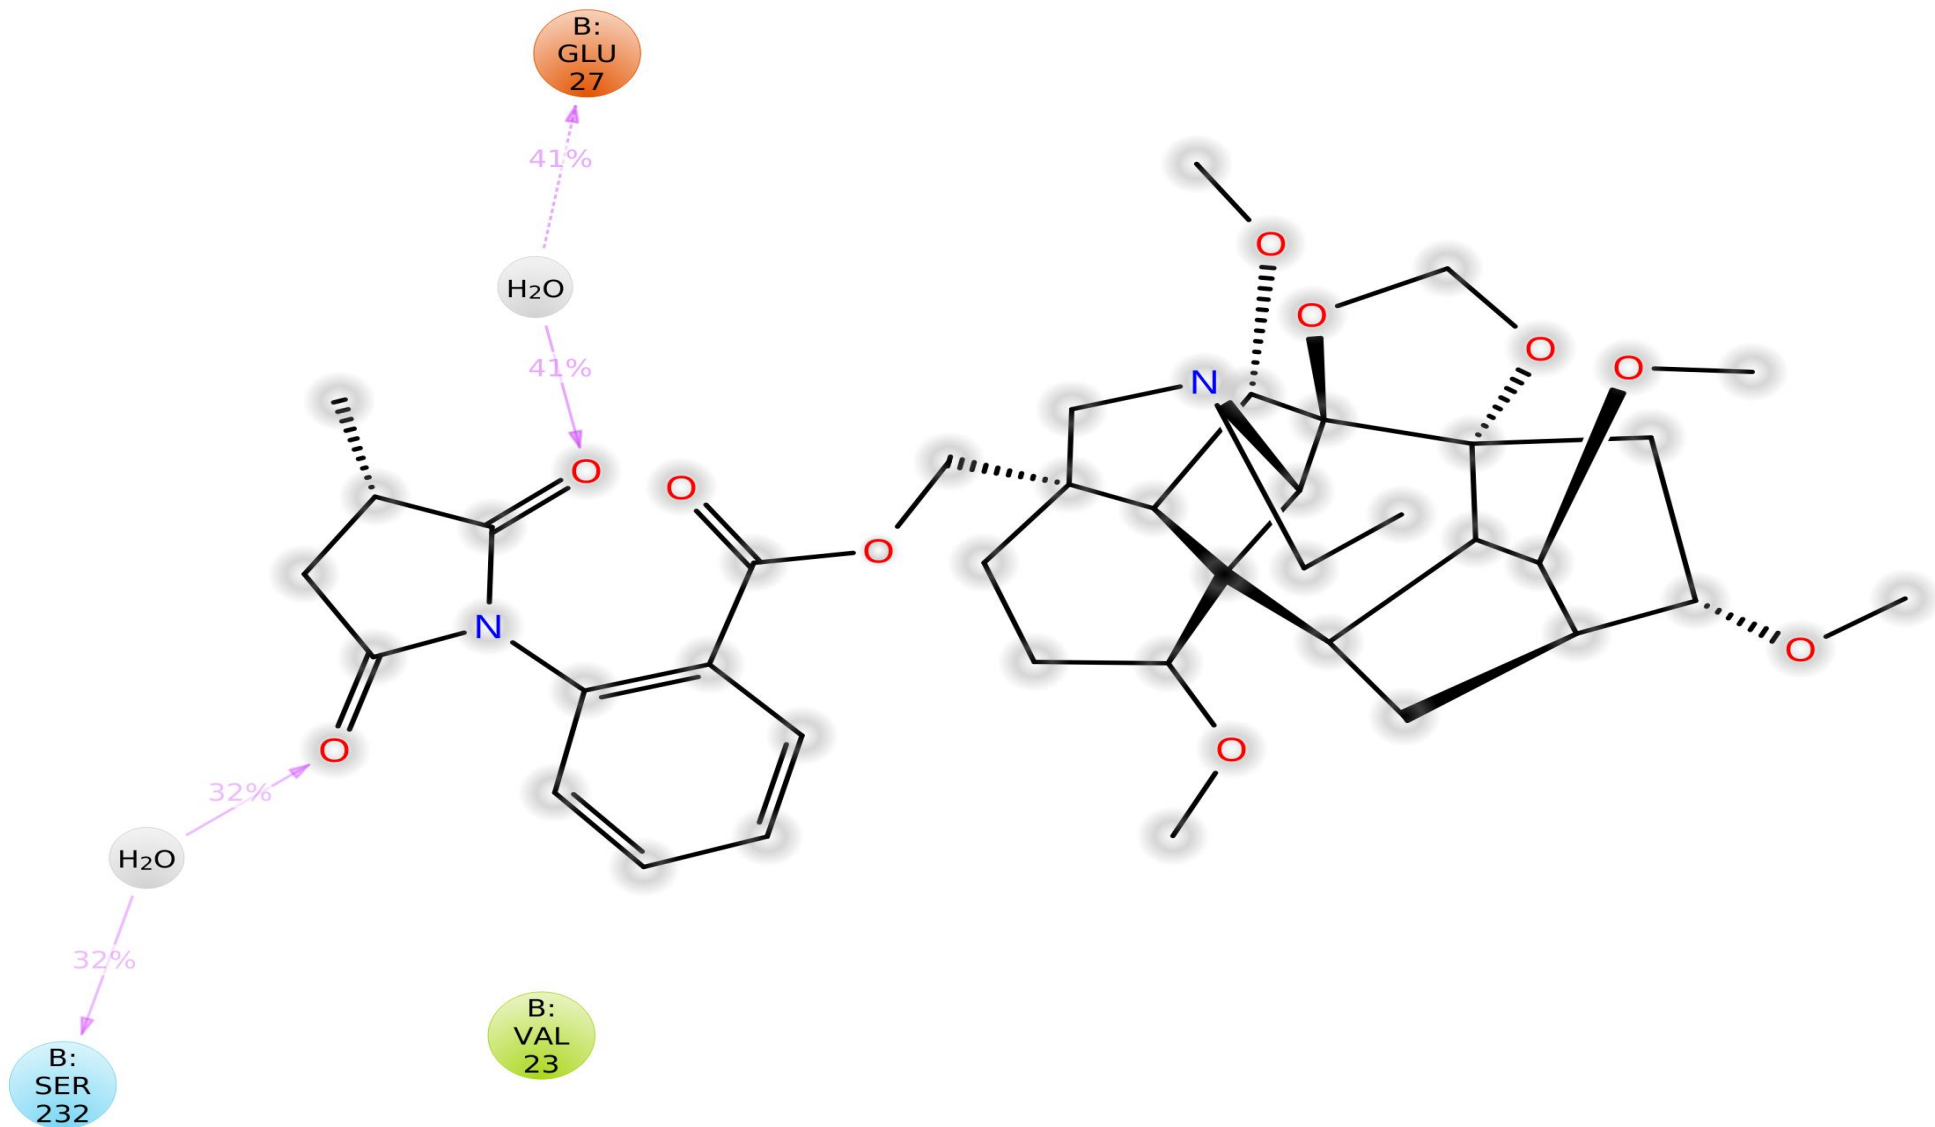

**Fig. S5. Ligand (Elatine)-Protein (Beta-Tubulin) Contacts**

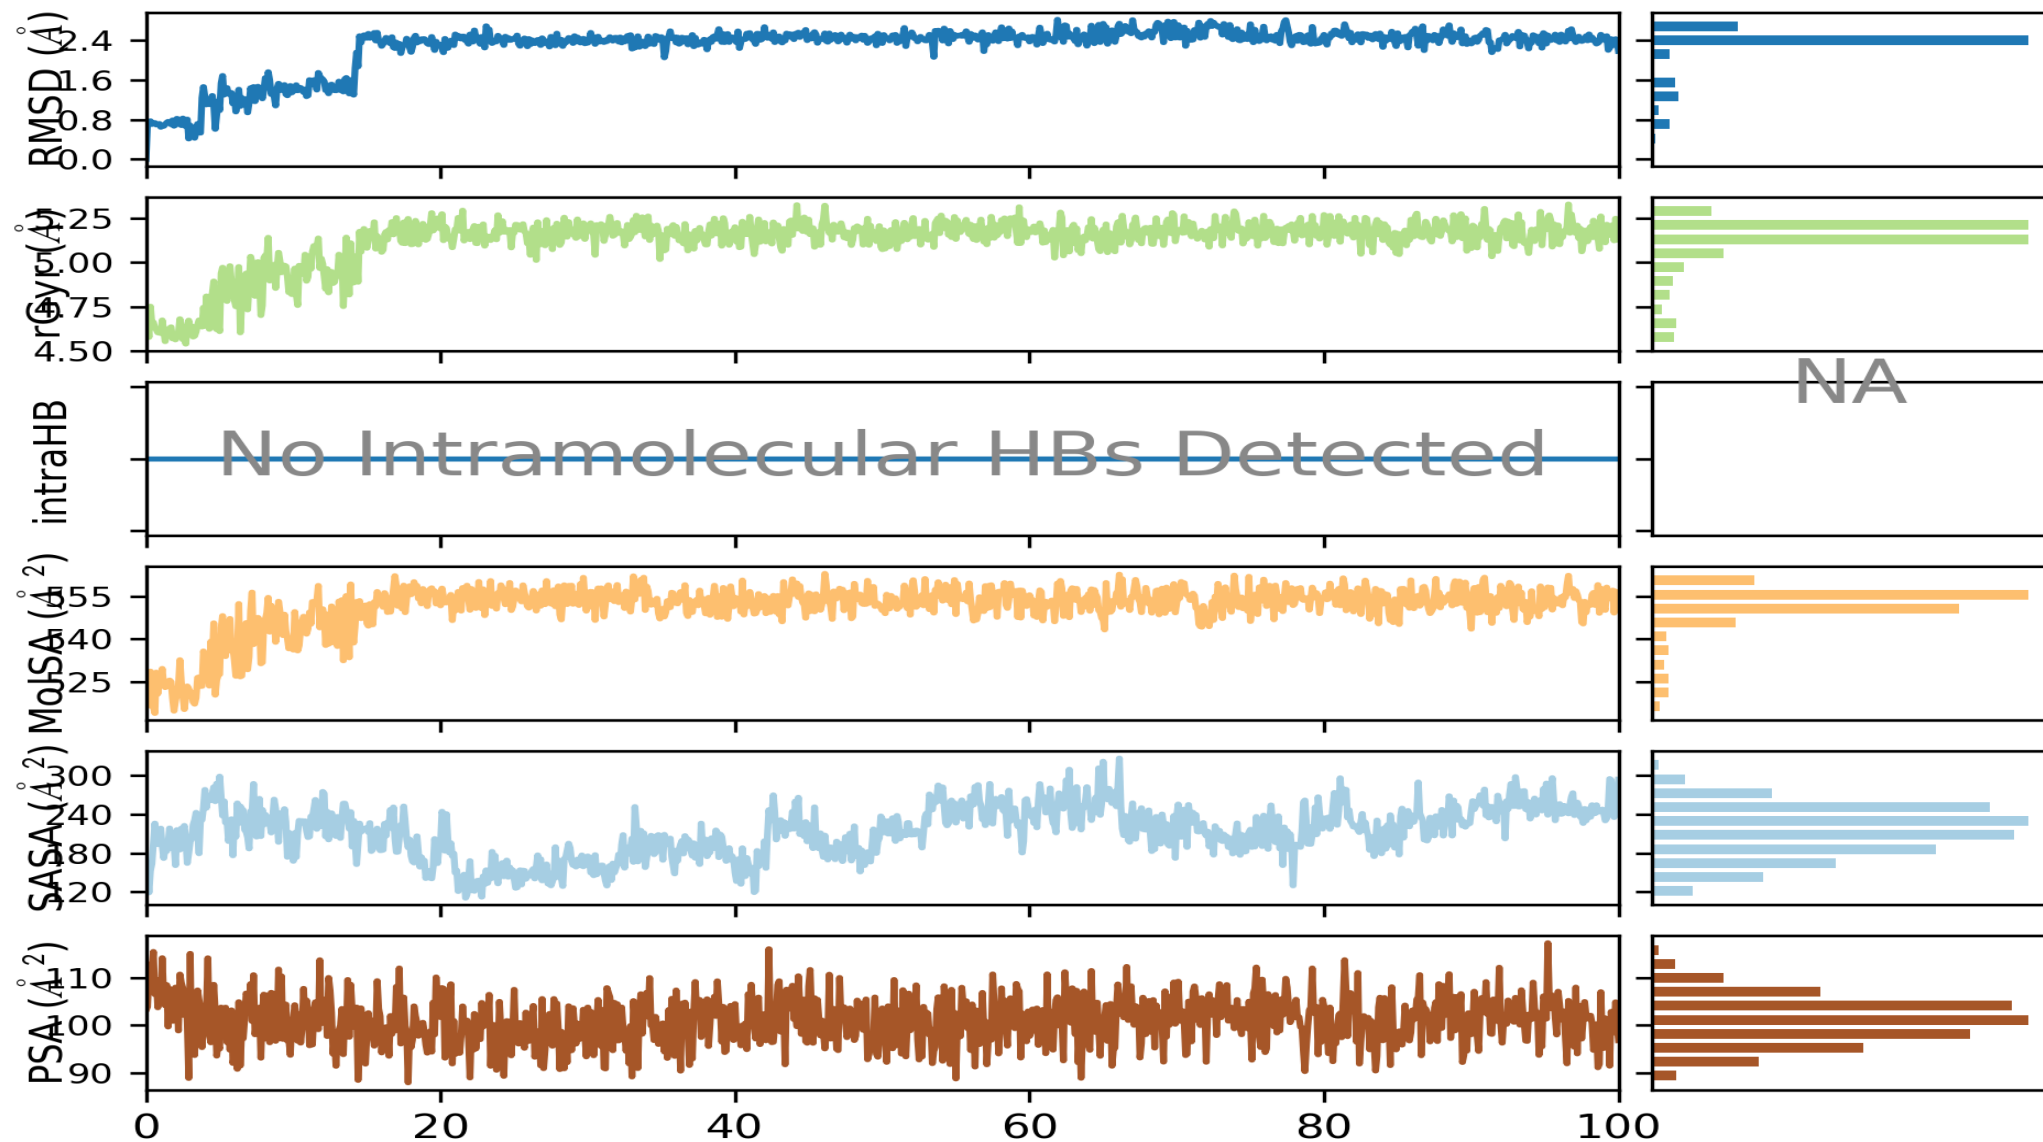

**Fig. S6. Root Mean Square Deviation, Intramolecular Hydrogen Bonds, Radius of Gyration, Solvent Accessible Surface Area, Molecular surface Area, and Polar Surface plots of the hit compound (Elatine).**



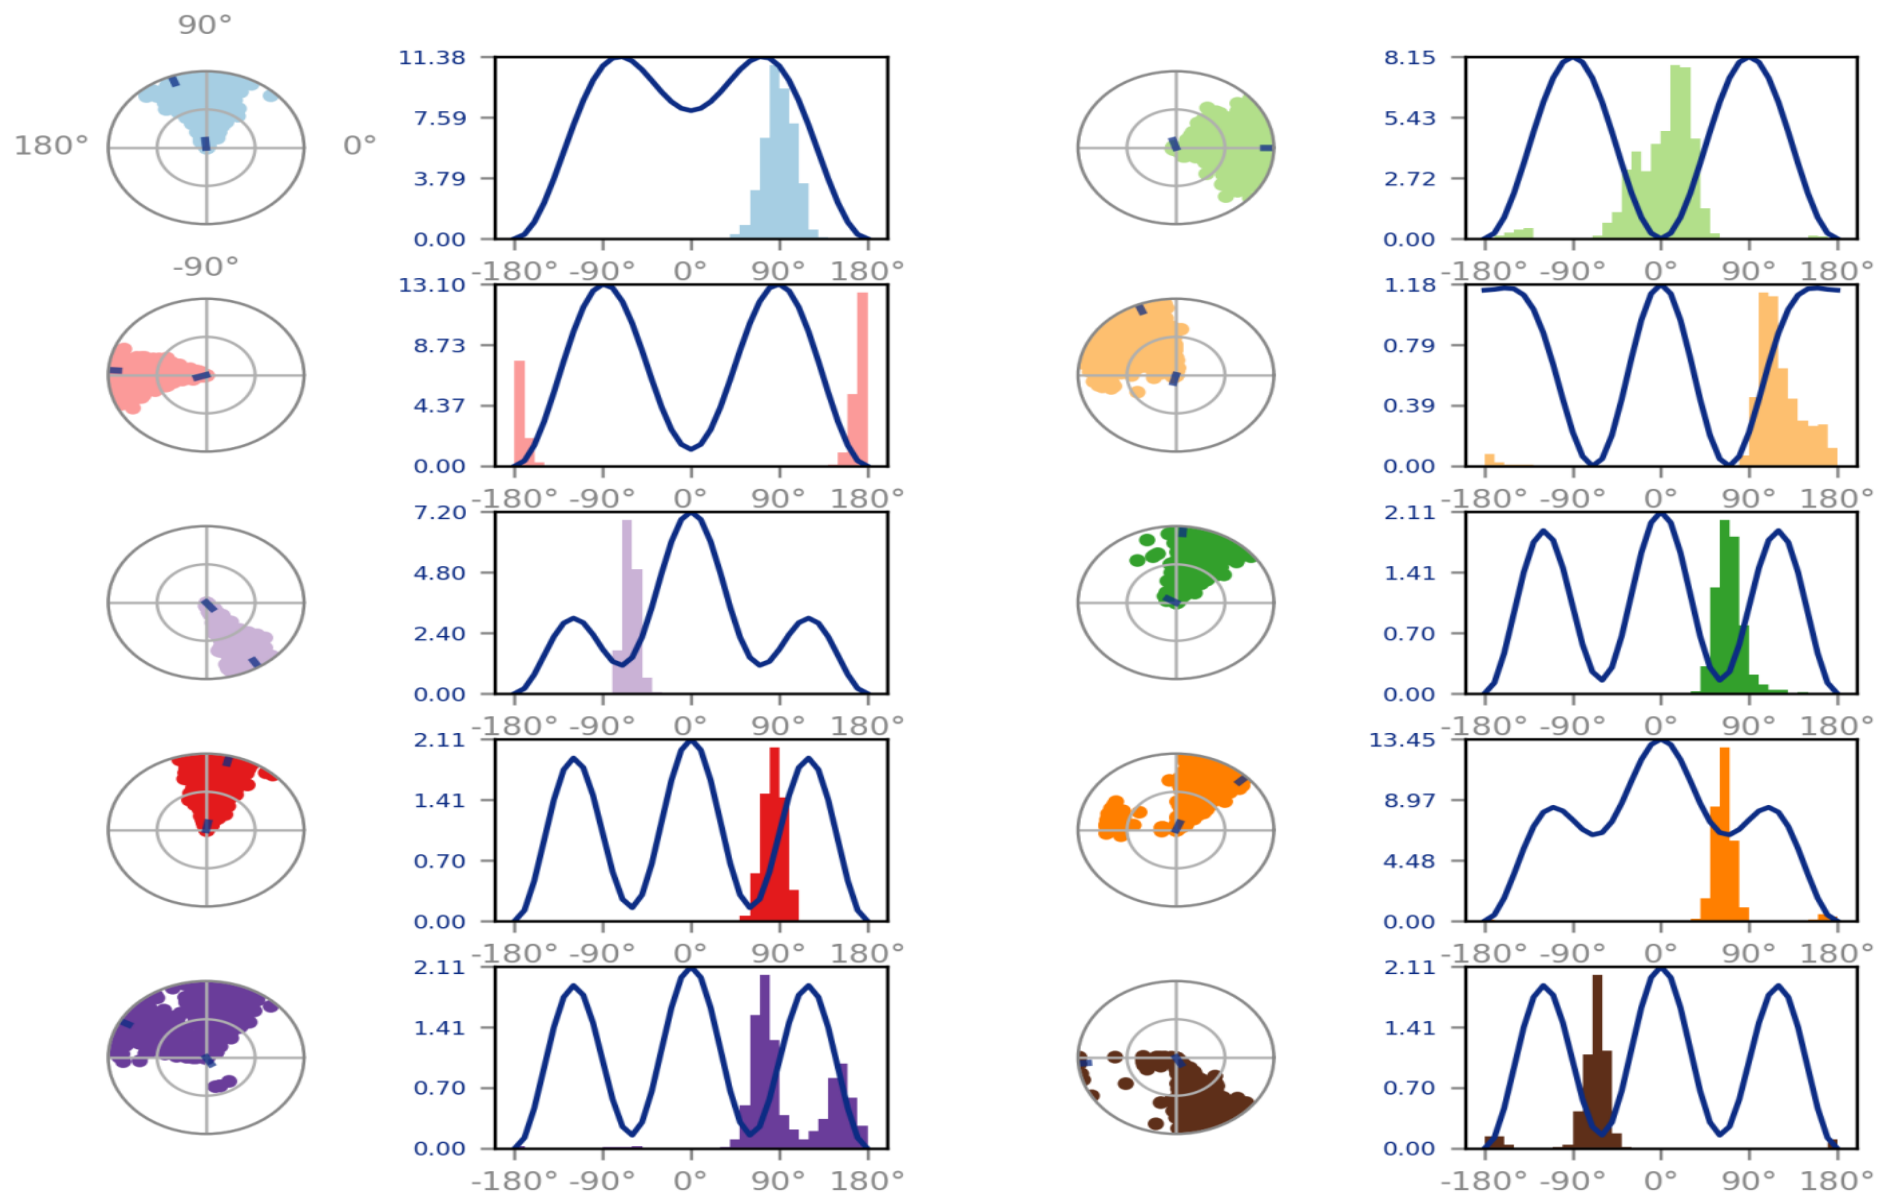

**Fig. S8. Rotatable bonds (RBS) in the ligand throughout the simulation trajectory ( 0.00 through 100.00 nsec).**



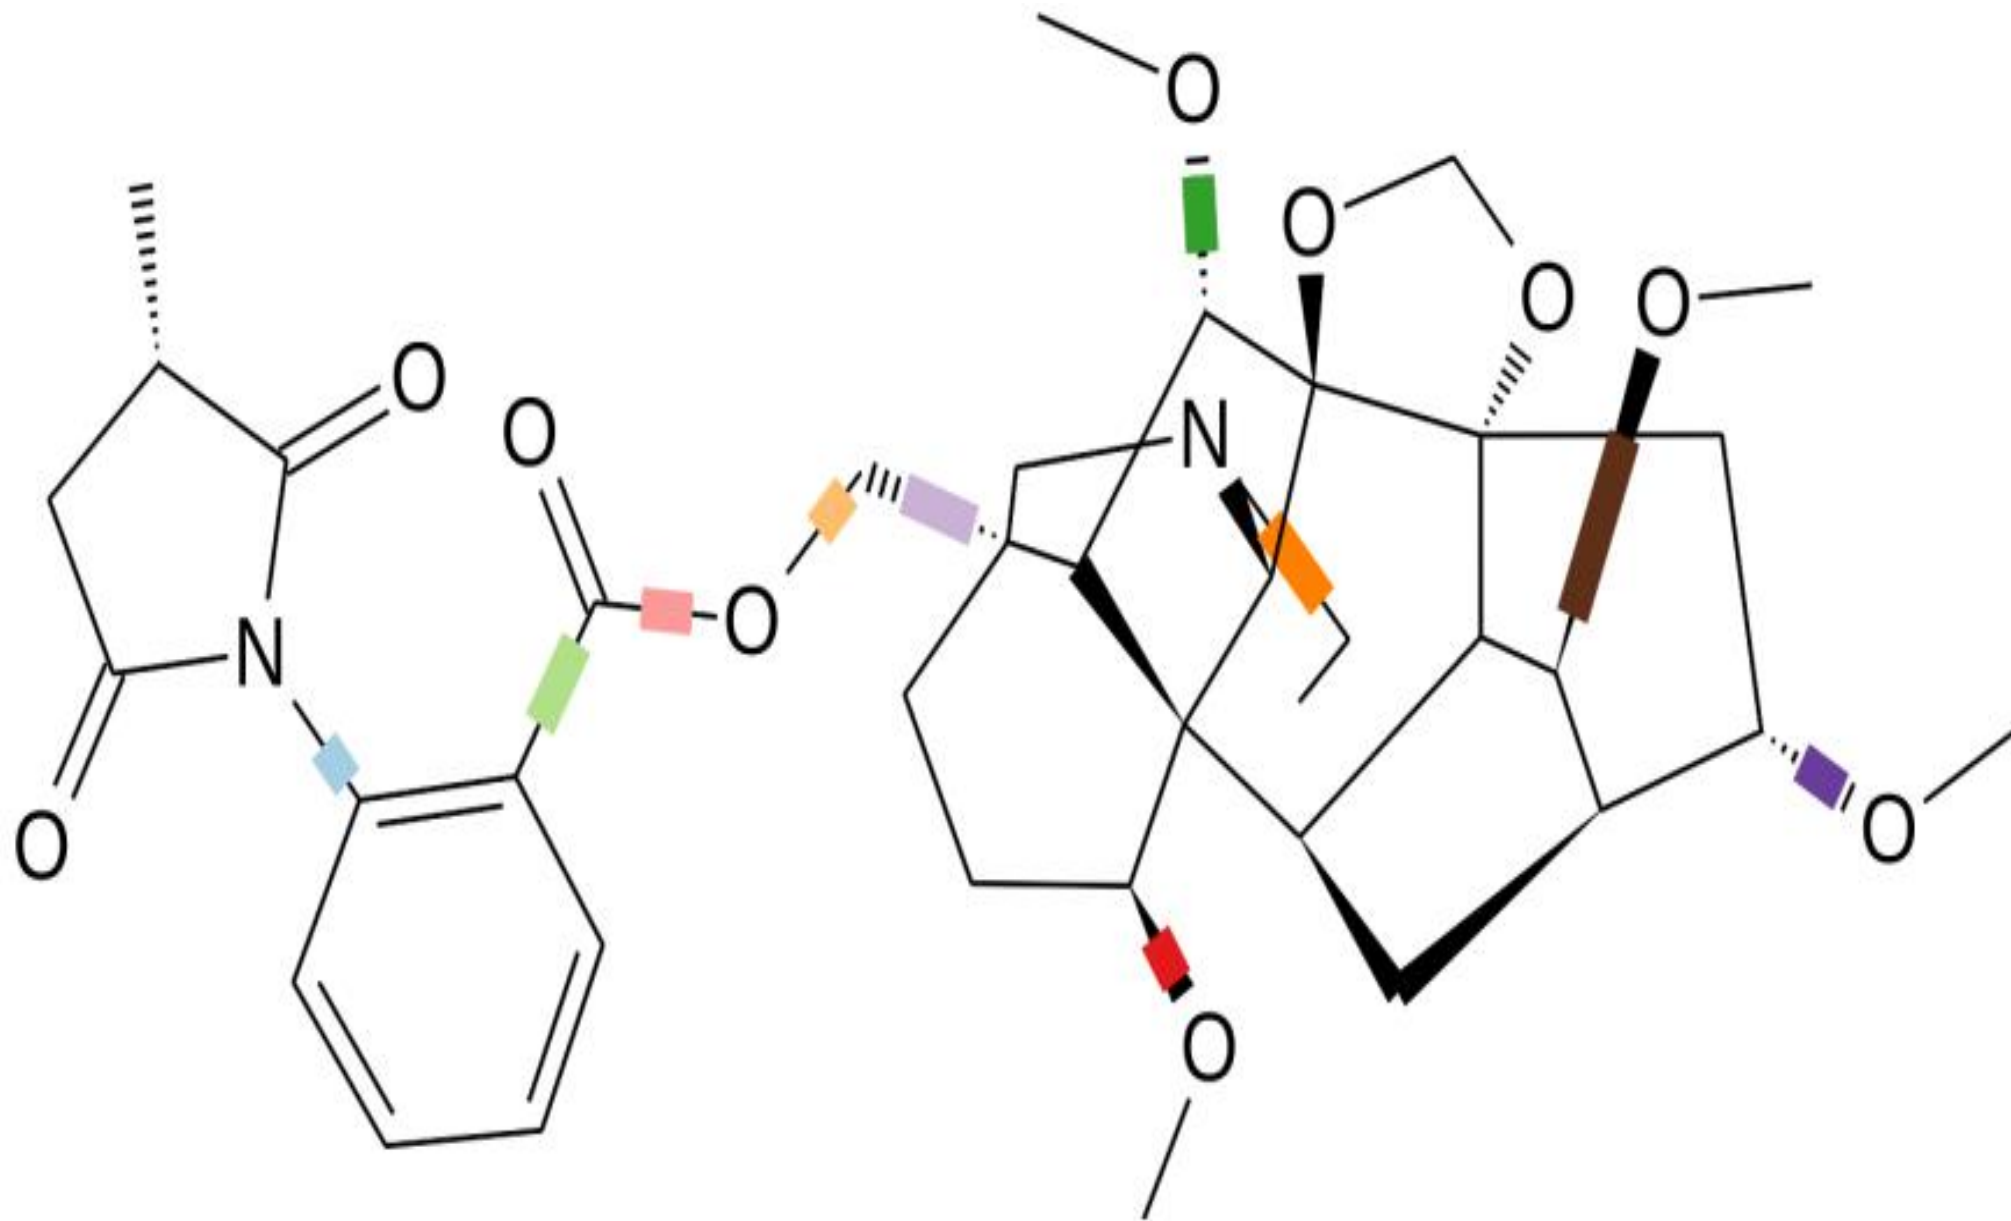

**Fig. S9. Ligand Torsion Profile**

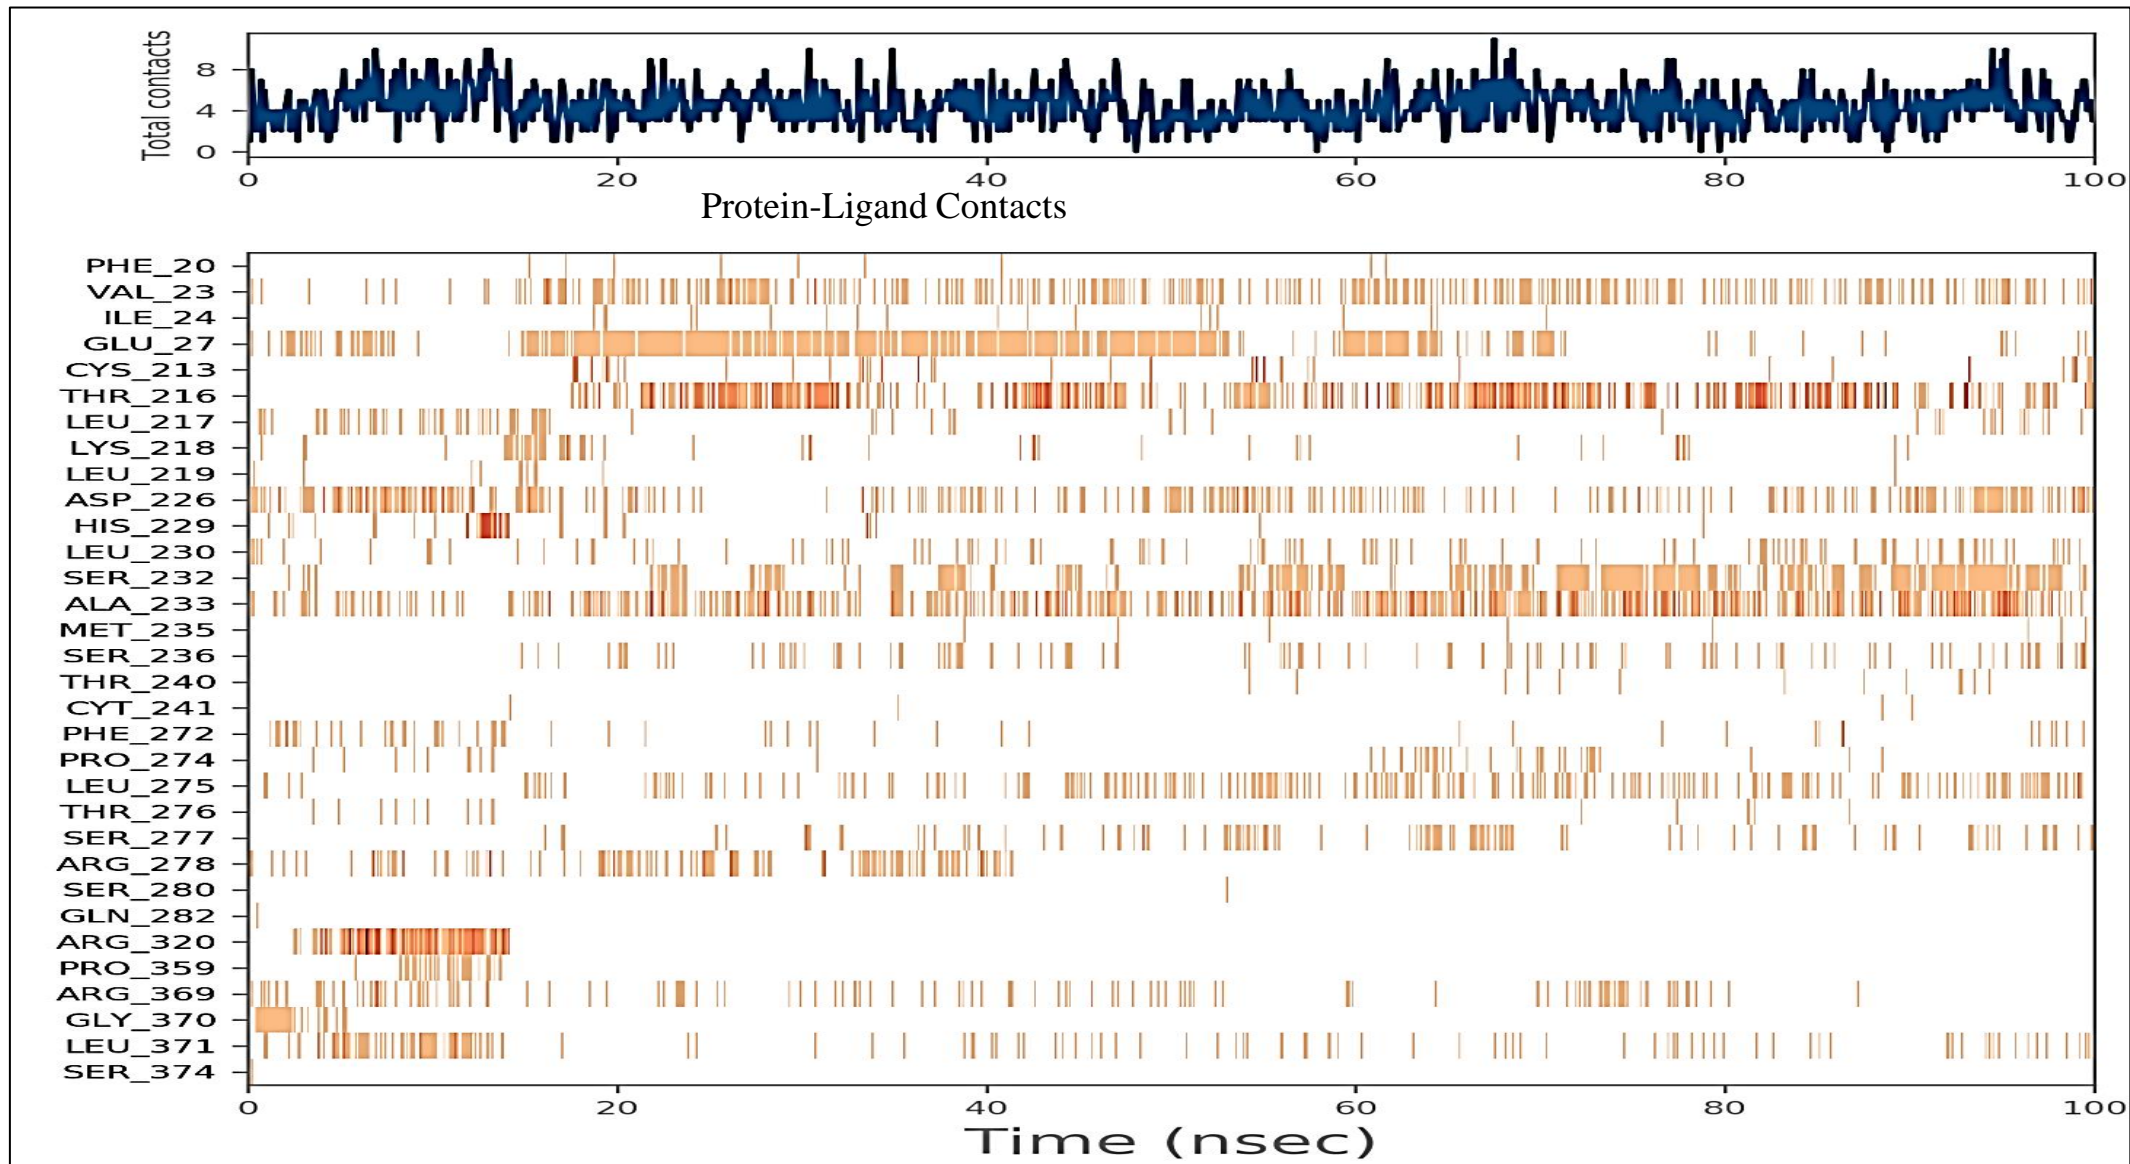

**Fig. S10.** The top panel shows the total number of specific contacts the protein makes with the ligand over the course of the trajectory. The bottom panel shows which residues interact with the ligand in each trajectory frame. Some residues make more than one specific contact with the ligand, which is represented by a darker shade of orange, according to the scale to the right of the plot.

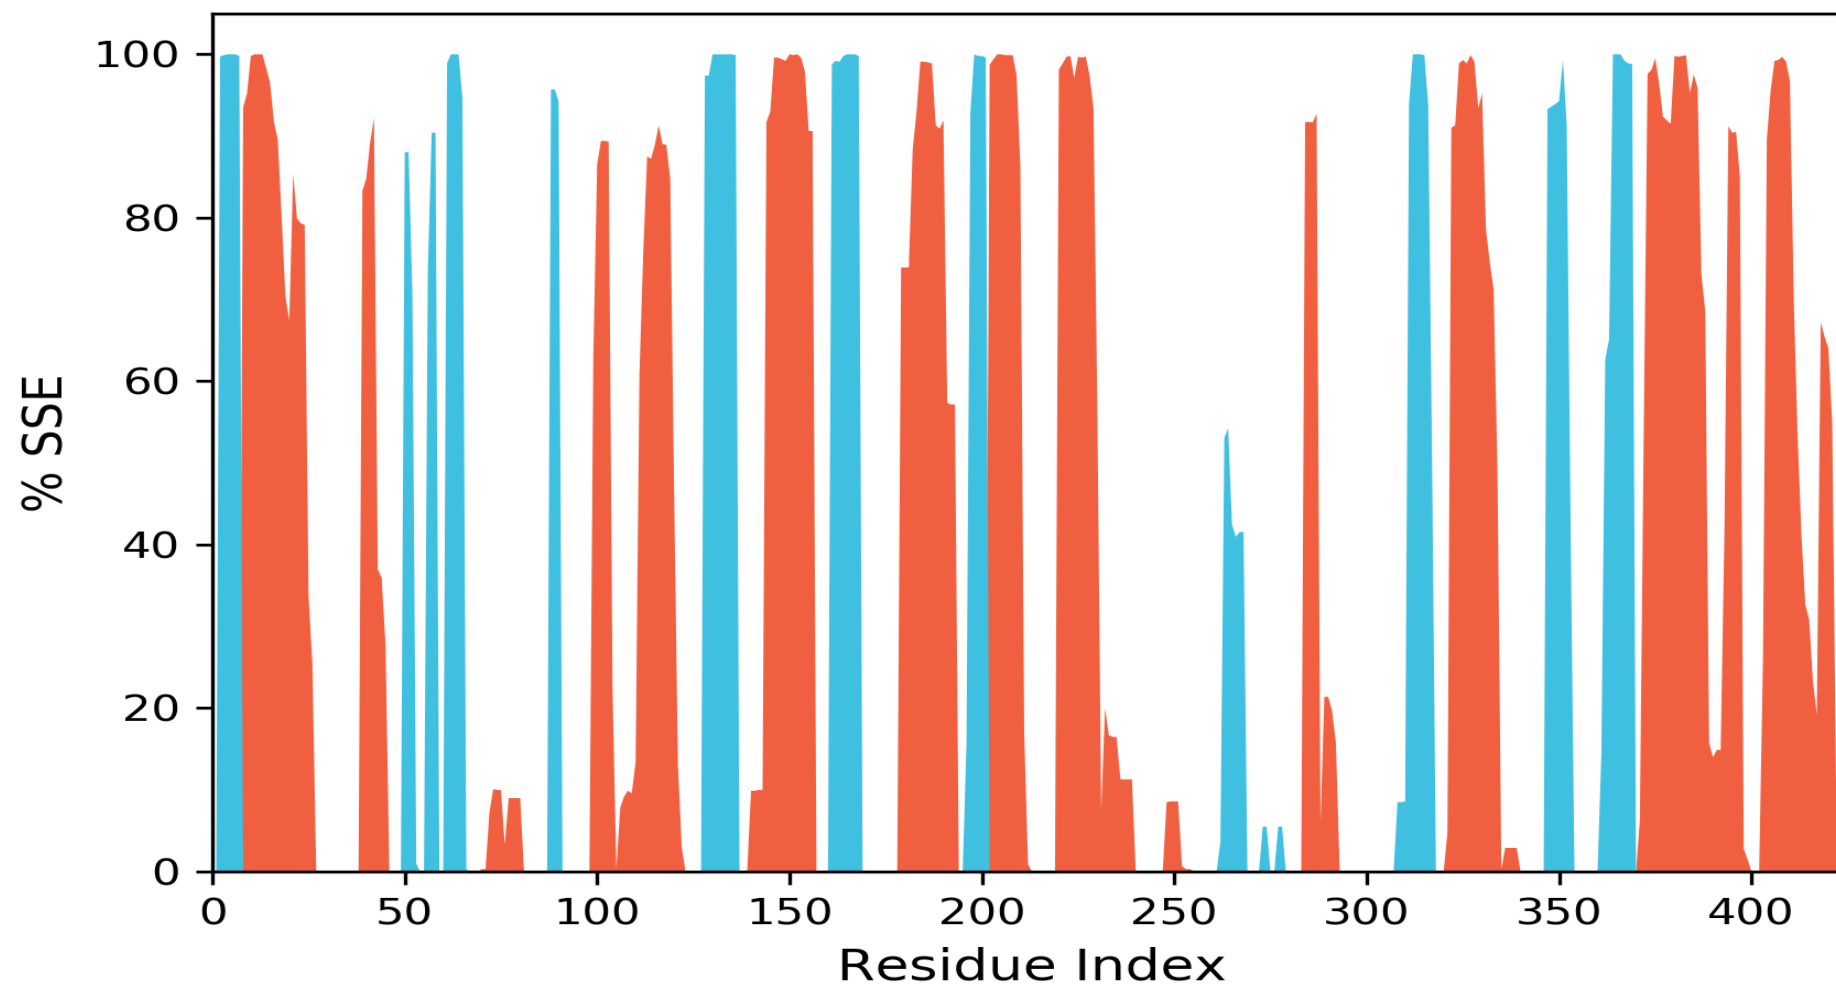

**Fig. S11. Protein Secondary Structure**

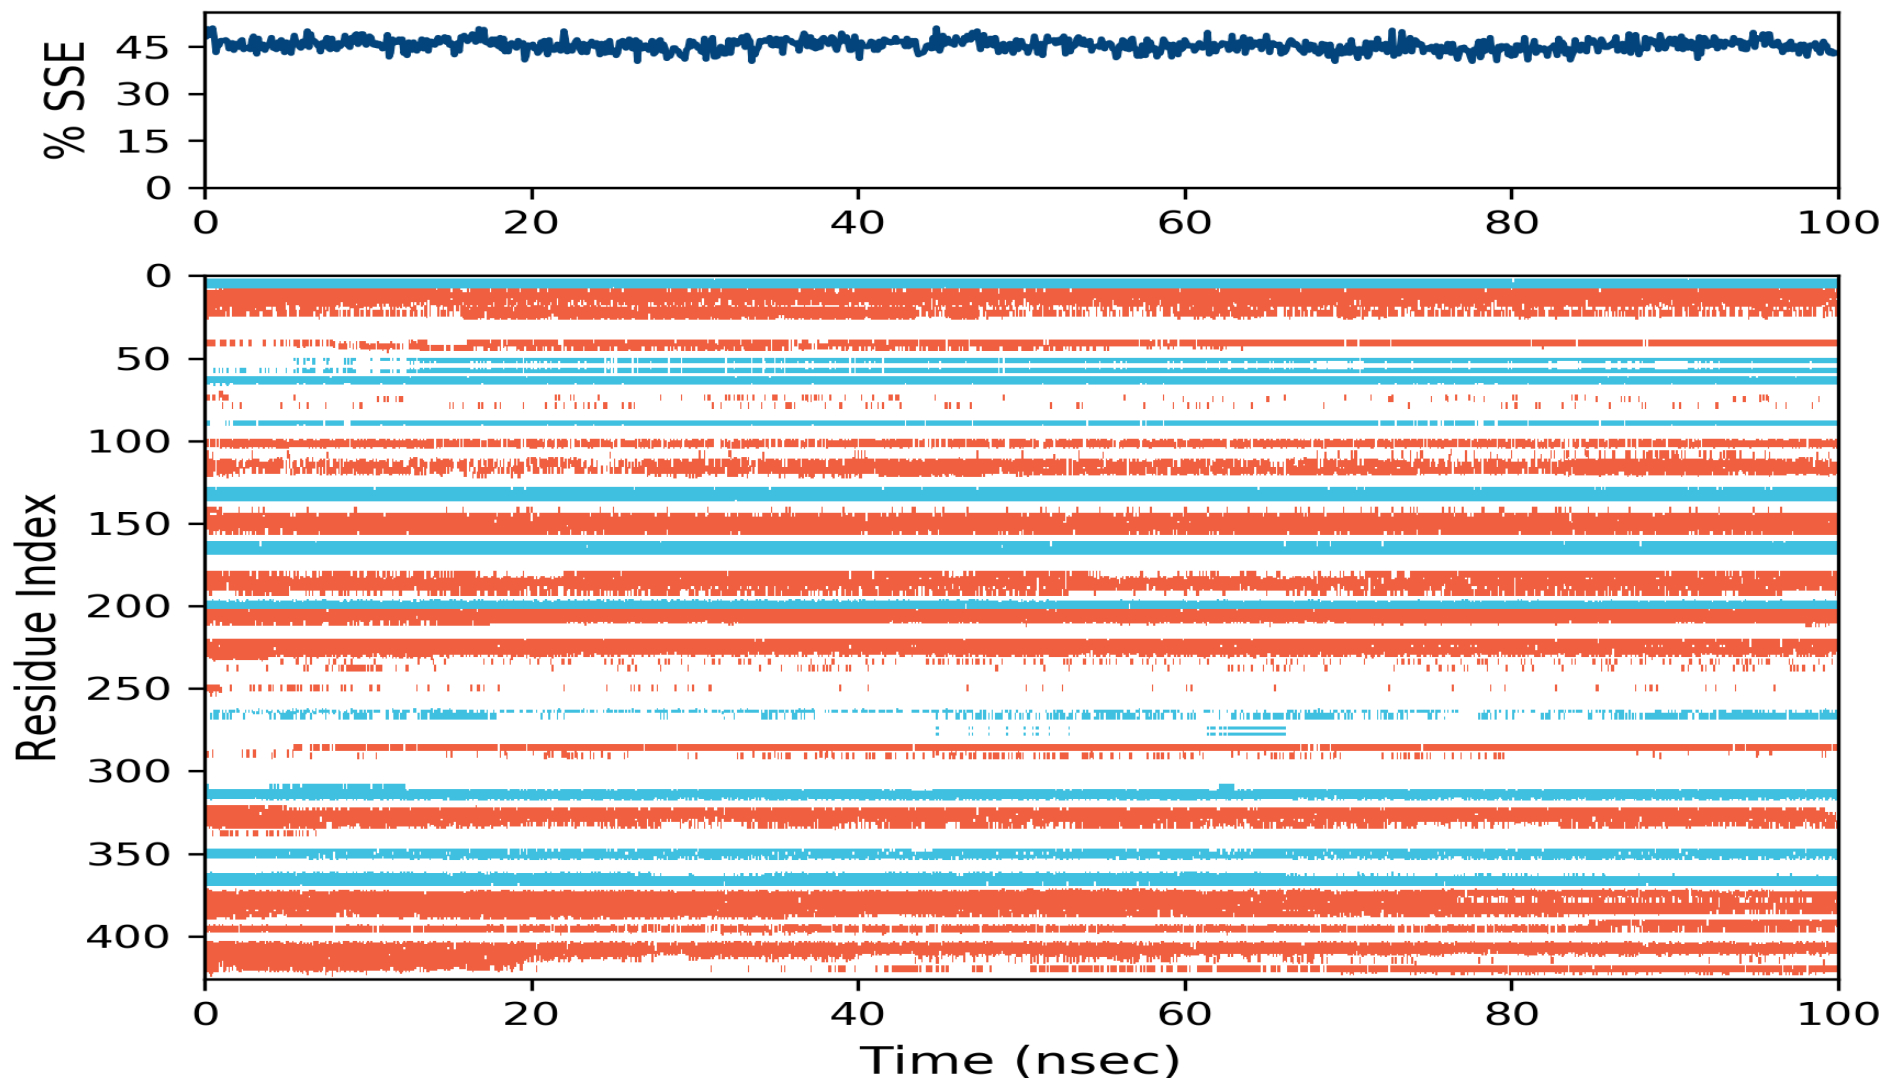

**Fig. S12.** Protein secondary structure elements (SSE) like alpha-helices and beta-strands are monitored throughout the simulation. The plot above reports SSE distribution by residue index throughout the protein structure. The plot below summarizes the SSE composition for each trajectory frame over the course of the simulation, and the plot at the bottom monitors each residue and its SSE assignment over time.

**Supplementary data: Phytocompounds present in the various extracts of *Geranium wallichianum* analyzed through LC/MS technique**

| S. NO. | Methanol Extract                  | Ethanol Extract                 | Ethyl Acetate Extract             | Petroleum ether Extract             |
|--------|-----------------------------------|---------------------------------|-----------------------------------|-------------------------------------|
| 1.     | $\alpha$ - Bisabolol              | Linalool                        | Ferulic acid ethyl ester          | Ferulic acid methyl ester           |
| 2.     | $\beta$ -Elemene                  | Quinic acid                     | Germacrene                        | Geryl butyrate                      |
| 3.     | $\beta$ -udesmol                  | Docosane                        | Germacrene iso                    | $\gamma$ - cadenene                 |
| 4.     | Quercetin                         | Tridecanal                      | Neryl acetate                     | Modhephene                          |
| 5.     | Caffeic acid                      | $\beta$ - Selinene              | Germacrene-D                      | Benzaldehyde                        |
| 6.     | Kaempferol                        | Nerolidol acetate               | Germacrene-A                      | Ishwarane                           |
| 7.     | Thymol                            | Endo-Borneol                    | Kaempferol                        | Caryophyllene oxide                 |
| 8.     | Camphene                          | Sabinene                        | Elatine                           | 5,5-Dimethyl-2(5H)-furanone         |
| 9.     | $\beta$ -Elemene                  | Trans-Linalool oxide            | Geranylacetone                    | 1-Octenyl acetate                   |
| 10.    | Kaempferol 3,7,4'-trimethyl ether | Camphor                         | Cuparene                          | Benzyl benzoate                     |
| 11.    | Geraniol                          | p-Cymene                        | Herniarin                         | Hexanal                             |
| 12.    | cis-Linalool oxide                | $\gamma$ -Curcumene             | p-Cymen-8-ol                      | Limonene                            |
| 13.    | p-Cymen-7-ol                      | Trans-Pinocarveol               | Linalyl acetate                   | 2,4,6-trihydroxyethylbenzoate       |
| 14.    | p-Cymene                          | Epicatchin                      | Geranyl acetate                   | Piperitone                          |
| 15.    | Methyl hexadecanoate              | $\beta$ -Himachalene            | Nerolidol acetate                 | Hexanoic acid                       |
| 16.    | p-coumaric acid                   | Myricetin                       | Gallic acid                       | Metronidazole                       |
| 17.    | Homoeriodictyol                   | Caftaric acid                   | Bornyl acetate                    | Quercetin-4'-O-glucoside            |
| 18.    | Lutein                            | $\beta$ -Pinene                 | Geraniin                          | Caffeic acid                        |
| 19.    | Kaempferol 3-methyl ether         | $\gamma$ -Elemene               | Hexadecanal                       | 3-Methyl-2-hexanone                 |
| 20.    | Kaempferol 4'-methyl ether        | Nerol                           | Catechin                          | Tetrahydrogeranyl acetone           |
| 21.    | Methyl tetradecanoate             | Quercetin-3-O-rhamnogalactoside | Kaempferol-3-O-glucoside          | Quercetin 3,3'-dimethyl ether       |
| 22.    | Menthol                           | (E)-2-Methyl-2-butenic acid     | Quercetin 3,7, 3'-trimethyl ether | Hyperoside                          |
| 23.    | Ferulic acid                      | Cis-Jasmone                     | Beta Caryophyllene                | Carvone                             |
| 24.    | Emetine                           | Maltol                          | Apigenin                          | Tricyclene                          |
| 25.    | Acetovanillone                    | Borneol                         | Quercetin-3-O-galactoside         | 2,6-Dimethyl-1,7-octadien-3,6-diola |
| 26.    | Dichloromethane-MeOH              | Gallic acid 3,5-dimethyl ether  | Gallotannin                       | Hyperin                             |
| 27.    | Kaempferol-3-O-rhamnogalactoside  | Sringic acid                    | Morin                             | Benzoic acid                        |
| 28.    | Phytol                            | Chlorogenic acid                | 3',4'-Dimethoxyflavone            | Rimantadine                         |
| 29.    | Apigenin                          | Luteolin                        | Ellagitannin                      | Quercetin-3-O-rhamnoside            |
| 30.    | Oleanolic acid                    | Kobusin                         | Ethyl hexadecanoate               | Eudesmin                            |
| 31.    | Germacrene-B                      | Retusin                         | Kaempferol-3-O-rutinoside         | 2,6-Dimethyl-3,7-octadiene-2,6-diol |
| 32.    | 3-Methyl-2-hexanone               | Cubeban-11-ol                   | Apigenin                          | (E)-Furan linalool oxide            |
| 33.    | Ellagic acid                      | Isophytol                       | Beta sitosterol galactoside       |                                     |
| 34.    | 3-Methyl-2-butenal                |                                 | Undecanal                         |                                     |
| 35.    | Homoeriodictyol                   |                                 | Quercetin-7-O-glucoside           |                                     |
| 36.    | Beta sitosterol                   |                                 | Quercetin-3-O rutinoside          |                                     |
| 37.    | Quercetin-3-O-glucoside           |                                 | Lutein                            |                                     |
| 38.    | Cadalene                          |                                 |                                   |                                     |
| 39.    | $\alpha$ - Cadinol                |                                 |                                   |                                     |
| 40.    | Quercetin-3-O-galactoside         |                                 |                                   |                                     |
| 41.    | Germacrene-A                      |                                 |                                   |                                     |
